# Supplementary material
Source: PubMed Central journal article supplement (PMC3299207)
Supplement: djn366_2.pdf [file djn366_2.pdf]

Supplementary Table 1. Clinical characteristics of FA SCCs\*

| FA sample | Sex | Age, y | Site          | Therapy  | Primary tumor | Recurrence | Age at AML, y | Age at BMT, y | GvHD | Disease-free interval (mo) | Follow-up interval (mo) | Vital status |
|-----------|-----|--------|---------------|----------|---------------|------------|---------------|---------------|------|----------------------------|-------------------------|--------------|
| Fa1_t     | F   | 26     | BOT           | SURGRT   | T2N0          | SPT        | -             | -             | -    | 62                         | 62                      | DD Fa1_g     |
| Fa1_g     | F   | 31     | Gingiva       | SURG     | T4N0          | LOC        | -             | -             | -    | 13                         | 15                      | DD           |
| Fa3       | F   | 34     | Lip           | SURG     | T2N1          | LOC        | -             | 12            | No   | 8                          | 12                      | DD           |
| Fa4       | F   | 30     | Buccal mucosa | SURG     | T1N0          | -          | 30            | -             | -    | 1                          | 1                       | DC           |
| Fa5       | F   | 36     | Anus          | SURG     | CIS           | SPT        | -             | -             | -    | 17                         | 76                      | Alive        |
| Fa6_e     | F   | 39     | Esophagus     | SURG     | T3N1          | DM         | -             | -             | -    | 2                          | 4                       | DD           |
| Fa6_v     | F   | 37     | Vulva         | SURG     | CIS           | SPT        | -             | -             | -    | 3                          | 34                      | DD Fa6_e     |
| Fa8       | M   | 22     | Mouth         | SURG     | T4N?          | LOC        | -             | 13            | Yes  | 5                          | 20                      | DD           |
| Fa9       | F   | 30     | Esophagus     | SURG     | U             | U          | -             | -             | -    | U                          | U                       | U            |
| Fa10      | F   | 13     | Tongue        | SURG     | T1N0          | SPT        | -             | 11            | No   | 13                         | 39                      | Alive        |
| Fa11      | F   | 24     | Mouth         | SURG     | U             | LOC        | -             | -             | -    | 12                         | 49                      | DOC          |
| Fa12      | M   | 29     | Hypopharynx   | Laser/RT | U             | U          | -             | 12            | U    | 1                          | 9                       | DD           |
| Fa13      | F   | 28     | Vulva         | SURG     | T1N0          | LOC        | -             | -             | -    | 12                         | 60                      | DD           |
| Fa14      | F   | 25     | Tongue        | SURGRT   | U             | -          | -             | 9             | Yes  | 31                         | 31                      | Alive        |
| Fa15      | F   | 44     | Soft palate   | SURG     | T1N0          | SPT        | -             | -             | -    | 39                         | 115                     | Alive        |
| Fa16      | F   | 25     | Tongue        | SURG     | T1N2b         | SPT        | -             | 9             | No   | 10                         | 10                      | DD           |
| Fa17      | M   | 16     | Tongue        | SURG     | T1N0          | -          | -             | 4             | Yes  | 24                         | 24                      | DOC          |
| Fa18      | F   | 56     | Epiglottis    | SURG     | T?N0          | -          | -             | -             | -    | 1                          | 1                       | Alive        |
| Fa19      | F   | 26     | Tongue        | SURG     | T1N0          | LOC        | -             | 7             | Yes  | 5                          | 10                      | DD           |
| Fa20      | M   | 21     | Palatum       | SURG     | T1N0          | SPT        | -             | 11            | No   | 5                          | 7                       | Alive        |
| Fa21      | F   | 25     | Oral cavity   | SURG     | T1N0          | REG        | -             | 9             | U    | 6                          | 91                      | DD           |

\*Specimens and clinical information were obtained for three patients from The Netherlands, four from Spain, one from Sweden, four from Germany, four from France, one from Ireland, and two from the United States. Fa1\_t and Fa1\_g are two primary SCCs from the same patient; Fa6\_e and Fa6\_v are two primary SCCs from the same patient. Multiple tumors from the same patient were included in the study only when their relative location (> 2 cm apart) or time interval between their diagnoses (> 3 years) clearly indicated that they were independent. Age (y) at which the first primary tumor was diagnosed is indicated. Tumor stage is given for the primary tumor, according to International Union Against Cancer (12). In some cases, a lymph node metastasis or recurrence rather than the primary tumor was analyzed. The disease-free interval was calculated from the date of histological diagnosis of the primary tumor to the date of recurrence or diagnosis of a second primary tumor, the last contact date, or date of death, whichever came first. DOC = death from other causes; DD = death from disease. M = Male; F = Female; BOT = base of tongue; U = unknown; CIS = carcinoma-in-situ; SPT = second primary tumor; LOC = local recurrence; DM = distant metastasis; REG = regional recurrence; BMT = bone marrow transplanted; SURG = surgery; RT = radiotherapy; GvHD = graft versus host disease.

Supplementary Table 2. Data summary for all SSC FA samples\*

| Sample | BMT | Genetic analysis |                     |                   | Immunohistochemistry |     | HPV detection |          |
|--------|-----|------------------|---------------------|-------------------|----------------------|-----|---------------|----------|
|        |     | freq LOH         | T-Source            | TP53 mutation     | p16                  | p53 | GP5+/6+       | HPV type |
| Fa1_t  | -   | 9/14 (64%)       |                     | ND                | -                    | +   | -             | none     |
| Fa1_g  | -   | 11/18 (61%)      |                     | WT                | -                    | -   | -             | none     |
| Fa3    | +   | 18/18 (100%)     | OoT: patient        | R273L (G→T)       | -                    | +   | -             | none     |
| Fa4    | -   | 13/16 (81%)      |                     | WT                | -                    | -   | -             | none     |
| Fa5    | -   | 3/17 (18%)       |                     | WT                | +                    | -   | +             | HPV 16   |
| Fa6_e  | -   | 11/22 (50%)      |                     | R248W (C→T)       | -                    | +   | -             | none     |
| Fa6_v  | -   | 12/22 (55%)      |                     | R213* (C→T)       | +                    | +   | -             | none     |
| Fa8    | +   | 13/19 (68%)      | OoT: patient        | R282W (C→T)       | -                    | -   | -             | none     |
| Fa9    | -   | 15/19 (79%)      |                     | WT                | -                    | -   | -             | none     |
| Fa10   | +   | NE               | OoT: patient        | Del TG codon 215  | +                    | -   | -             | none     |
| Fa11   | -   | 13/20 (65%)      |                     | R175K (G→A)       | +                    | +   | -             | none     |
| Fa12   | +   | NE               | OoT: not conclusive | Del AC codon 208  | -                    | -   | -             | none     |
| Fa13   | -   | 1/14 (7%)        |                     | WT                | +                    | -   | +             | HPV 33   |
| Fa14   | +   | NE               | OoT NA              | WT, not dissected | NA                   | NA  | -             | none     |
| Fa15   | -   | 11/17 (65%)      |                     | R273H (G→A)       | -                    | +   | -             | none     |
| Fa16   | +   | NE               | OoT: patient        | del CC codon 127  | -                    | -   | -             | none     |
| Fa17   | +   | 13/17 (76%)      | OoT: patient        | WT                | -                    | +   | -             | none     |
| Fa18   | -   | 4/15 (27%)       |                     | WT                | -                    | -   | -             | none     |
| Fa19   | +   | NE               | OoT: patient        | NA                | NA                   | NA  | -             | none     |
| Fa20   | +   | NE               | OoT: not conclusive | NA                | NA                   | NA  | -             | none     |
| Fa21   | +   | NE               | OoT: patient        | Y234H (T→C)       | -                    | +   | -             | none     |

\* Available material was either paraffin blocks, frozen biopsies or paraffin sections in a vial. In some cases we only received DNA material from the tumor directly. BMT status of patients is indicated. The frequency of allelic loss is defined as the number of allelic losses per informative marker, with the percentage between brackets. Patterns of allelic loss are depicted in Table 2. OoT: Origin of tumor was determined on microsatellite markers of both patient and donor as explained in Supplementary Figure 2. NE= not evaluable. Due to donor contamination, reliable profiles could not always be established; only assignment of tumor origin could be evaluated in these cases. NA = Not analyzed due to lack of material. TP53 mutation analysis was performed on exons 5–9. WT = wild-type. Fa1\_t could not be analyzed due to lack of primary tumor material. In Fa19 and Fa20, too many donor-derived tumor-infiltrating lymphocytes were present in the tumor sample to establish a reliable profile. Immunostaining for p16 and p53 was performed on paraffin-embedded or frozen sections of tumor material, and the staining result is indicated. HPV DNA detection was performed on all tumors by GP5+/6+ PCR, and the HPV type and viral load were determined for HPV DNA–positive tumors.
